# Supplementary material for: Peripheral blood eosinophilia may be a prognostic biomarker in non-small cell lung cancer patients treated with immunotherapy
Source: PubMed Central journal article supplement — J Thorac Dis. 2021 May;13(5):2716–27. doi: 10.21037/jtd-20-3525 (PMC8182546; doi:10.21037/jtd-20-3525), 2021-05
Supplement: jtd-13-05-2716-dss.pdf [file jtd-13-05-2716-dss.pdf]

## Data Sharing Statement

|                     |                                                                                                                                                    |                                                                                                                                                                |
|---------------------|----------------------------------------------------------------------------------------------------------------------------------------------------|----------------------------------------------------------------------------------------------------------------------------------------------------------------|
| <b>Article Info</b> | <a href="http://dx.doi.org/10.21037/jtd-20-3525">http://dx.doi.org/10.21037/jtd-20-3525</a> .                                                      |                                                                                                                                                                |
| <b>Item</b>         | <b>Question</b>                                                                                                                                    | <b>Authors' Response<br/>(place "-" if not applicable)</b>                                                                                                     |
| 1                   | Would you like to share data collected for your study to others?                                                                                   | Yes.                                                                                                                                                           |
| 2                   | If not, would you like to share the reason for your decision?                                                                                      | -                                                                                                                                                              |
| 3                   | What data in particular will be shared?                                                                                                            | The authors consent to share all the information, including raw data, as long as it is properly cited.                                                         |
| 4                   | Any other documents will be share? Such as study protocol, statistical analysis plan, informed consent form, clinical study report, analytic code. | No.                                                                                                                                                            |
| 5                   | When will data availability begin?                                                                                                                 | From the publication date.                                                                                                                                     |
| 6                   | When will data availability end?                                                                                                                   | Two years within the publication date, since the new data may be updated over time                                                                             |
| 7                   | To whom will you share the data?                                                                                                                   | Medical oncologists and pulmonologists interested in biomarkers of response to immunotherapy.                                                                  |
| 8                   | For what type of analysis or purpose?                                                                                                              | To evaluate the role of peripheral eosinophils as a biomarker of prognosis in non-small cell lung cancer patients treated with immunotherapy.                  |
| 9                   | How or where can the data/documents be obtained?                                                                                                   | Emails could be sent to the address below to obtain the shared data:<br><a href="mailto:adelaide.pereira.alves@gmail.com">adelaide.pereira.alves@gmail.com</a> |
| 10                  | Any other restrictions?                                                                                                                            | We may balance the potential benefits for each request and then provide the data that could be shared.                                                         |
